# Supplementary material
Source: publisher figshare collection journal article supplement (https://tandf.figshare.com/ndownloader/files/13729265)
Supplement: Supplementary file 1 [file 13729265]

Supplement 1

**Table S1**: Sociodemographic characteristics stratified by federal state (Supplement 1)

|  | **Federal state**  **of Germany** | **n** | **boys, %** | **age** | **migration background %** |
| --- | --- | --- | --- | --- | --- |
| **Northern**  **Germany** | Schleswig-Holstein | 3,856 | 45.5 | 12.8  (11.1; 14.1) | 9.1 |
| Hamburg | 1,764 | 47.8 | 11.8  (9.5; 13.9) | 31.8 |
| Bremen | 207 | 46.9 | 12.8  (10.5; 15.0) | 21.3 |
| [Lower](http://dict.leo.org/ende/index_de.html#/search=Lower&searchLoc=0&resultOrder=basic&multiwordShowSingle=on) [Saxony](http://dict.leo.org/ende/index_de.html#/search=Saxony&searchLoc=0&resultOrder=basic&multiwordShowSingle=on) | 3,033 | 46.1 | 12.7  (10.6; 14.4) | 15.2 |
| [Mecklenburg-Western](http://dict.leo.org/ende/index_de.html#/search=Mecklenburg-Western&searchLoc=0&resultOrder=basic&multiwordShowSingle=on) [Pomerania](http://dict.leo.org/ende/index_de.html#/search=Pomerania&searchLoc=0&resultOrder=basic&multiwordShowSingle=on) | 714 | 43.1 | 13.0  (11.1; 14.4) | 4.1 |
| **Eastern Germany** | Berlin | 3,378 | 47.3 | 11.5  (9.0; 13.7) | 49.7 |
| Brandenburg | 1,039 | 44.7 | 12.1  (9.9;14.1) | 14.9 |
| Saxony | 2,265 | 46.4 | 12.0  (9.5; 13.8) | 5.8 |
| [Saxony-Anhalt](http://dict.leo.org/ende/index_de.html#/search=Saxony-Anhalt&searchLoc=0&resultOrder=basic&multiwordShowSingle=on) | 901 | 47.3 | 12.3  (10.2; 14.1) | 7.4 |
| Thuringia | 1,182 | 44.6 | 12.0  (9.8;13.9) | 7.2 |
| **Western Germany** | [North](http://dict.leo.org/ende/index_de.html#/search=North&searchLoc=0&resultOrder=basic&multiwordShowSingle=on) [Rhine-Westphalia](http://dict.leo.org/ende/index_de.html#/search=Rhine-Westphalia&searchLoc=0&resultOrder=basic&multiwordShowSingle=on) | 5,969 | 46.1 | 12.7  (10.6; 14.5) | 17.3 |
| Hesse | 2,302 | 46.6 | 12.6  (10.5; 14.3) | 19.9 |
| [Rhineland-Palatinate](http://dict.leo.org/ende/index_de.html#/search=Rhineland-Palatinate&searchLoc=0&resultOrder=basic&multiwordShowSingle=on) | 1,142 | 47.4 | 13.2  (11.2; 14.7) | 15.2 |
| [Saarland](http://dict.leo.org/ende/index_de.html#/search=Saarland&searchLoc=0&resultOrder=basic&multiwordShowSingle=on) | 565 | 44.1 | 11.9  (10.3; 13.7) | 17.7 |
| **Southern Germany** | [Baden-Württemberg](http://dict.leo.org/ende/index_de.html#/search=Baden-W%C3%BCrttemberg&searchLoc=0&resultOrder=basic&multiwordShowSingle=on) | 5,195 | 47.2 | 12.8  (10.6; 14.6) | 15.7 |
| Bavaria | 7,430 | 48.2 | 13.5  (11.7; 15.1) | 21.7 |
| **p*** |  |  | 0.1109 | <0.0001 | <0.0001 |

*p for differences between the 16 federal states of Germany
